# Supplementary material for: Synthesis, structures and luminescence properties of 3d–4f heterometallic–organic frameworks (HMOFs) constructed from different copper halide clusters
Source: Royal Society of Chemistry journal article supplement (doi:10.1039/c5ce02544c), 2016-01-01
Supplement: c5ce02544c1.pdf [file c5ce02544c1.pdf]

## Supporting information

### Synthesis, Structures and Luminescent Properties of 3d-4f Heterometallic-organic Frameworks (HMOFs) Constructed by Different Copper Halide Clusters

Guang Zeng, Shanghua Xing, Xiuru Wang, Yulin Yang, Yang Xiao, Zhenhua Li, Guanghua Li,\* Zhan Shi, Shouhua Feng

Synthesis of 3-(pyridine-4-yl) benzoic acid (Hpba)

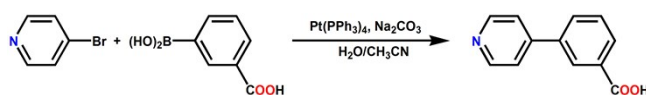

Hpba was synthesized according the previous report.<sup>1</sup> To a degassed solution of 3-Carboxyphenylboronic acid (1.70 g, 10.2 mmol), 4-bromopyridine hydrochloride (2.01 g, 10.3 mmol), and sodium carbonate (2.10 g, 19.8 mmol) in 100mL of a mixed solution (1:1 CH<sub>3</sub>CN:H<sub>2</sub>O) at room temperature, Pd(PPh<sub>3</sub>)<sub>4</sub> (0.30 g, 0.26 mmol) was added under N<sub>2</sub> pressure. The reaction mixture was refluxed for 22 h. the hot suspension was filtered. The filtrate was concentrated to about half of the original volume and then washed with CH<sub>2</sub>Cl<sub>2</sub>. The aqueous layer was acidified with concentrated HCl; the resulting white precipitate was collected, washed with CH<sub>3</sub>CN.

1. Sekiya, R.; Nishikiori, S.; Ogura, K. *Inorganic Chemistry*, **2006**, 45, 9233.

Table S1. Selected bond lengths (Å) in compound **1**

---

|                      |            |                     |            |
|----------------------|------------|---------------------|------------|
| <b>Gd(1)-O(6)#1</b>  | 2.312(6)   | <b>Gd(1)-O(3)</b>   | 2.343(5)   |
| <b>Gd(1)-O(2)#2</b>  | 2.349(6)   | <b>Gd(1)-O(1)</b>   | 2.372(6)   |
| <b>Gd(1)-O(5)</b>    | 2.394(6)   | <b>Gd(1)-O(7)</b>   | 2.416(7)   |
| <b>Gd(1)-O(4)#2</b>  | 2.437(6)   | <b>Gd(1)-O(3)#2</b> | 2.753(6)   |
| <b>Cu(1)-I(2)</b>    | 2.6956(15) | <b>Cu(1)-I(1)</b>   | 2.7219(15) |
| <b>I(1)-Cu(1)#4</b>  | 2.7220(15) | <b>I(2)-Cu(1)#4</b> | 2.6956(15) |
| <b>Cu(1)-Cu(1)#4</b> | 2.791(2)   | <b>Cu(1)-N(1)</b>   | 2.042(7)   |
| <b>Cu(1)-N(2)#3</b>  | 2.058(7)   |                     |            |

---

Symmetry codes: #1 -x+1,-y+1,-z+1    #2 -x,-y+1,-z+1    #3 x,y,z-1    #4 x,-y+1/2,z  
#5 x,y,z+1

Table S2. Selected bond lengths (Å) in compound 2

|                      |            |                      |            |
|----------------------|------------|----------------------|------------|
| <b>Gd(1)-O(1')</b>   | 2.262(18)  | <b>Gd(1)-O(1')#1</b> | 2.262(18)  |
| <b>Gd(1)-O(3)#1</b>  | 2.293(9)   | <b>Gd(1)-O(3)</b>    | 2.293(9)   |
| <b>Gd(1)-O(2)#2</b>  | 2.315(7)   | <b>Gd(1)-O(2)#3</b>  | 2.315(7)   |
| <b>Gd(1)-O(4')#1</b> | 2.44(6)    | <b>Gd(1)-O(4')</b>   | 2.44(6)    |
| <b>Gd(1)-O(1)</b>    | 2.466(15)  | <b>Gd(1)-O(1)#1</b>  | 2.466(15)  |
| <b>Gd(1)-O(4)</b>    | 2.50(6)    | <b>Gd(1)-O(4)#1</b>  | 2.50(6)    |
| <b>Cu(1)-N(1)</b>    | 2.048(8)   | <b>Cu(1)-I(1)#4</b>  | 2.6469(15) |
| <b>Cu(1)-Cu(1)#5</b> | 2.660(2)   | <b>Cu(1)-Cu(1)#6</b> | 2.661(2)   |
| <b>Cu(1)-I(1)#6</b>  | 2.6765(15) | <b>Cu(1)-I(1)</b>    | 2.7347(15) |
| <b>Cu(1)-Cu(1)#4</b> | 2.759(2)   | <b>I(1)-Cu(1)#4</b>  | 2.6470(15) |
| <b>I(1)-Cu(1)#5</b>  | 2.6765(15) |                      |            |

Symmetry codes: #1  $-x+1/2, y, -z+3/4$  ; #2  $-x+1/2, -y+1/2, z-1/2$  ; #3  $x+0, -y+1/2, -z+5/4$  ; #4  $-x+1, -y+1, z$  ; #5  $y, -x+1, -z+1$  ; #6  $-y+1, x, -z+1$  ;

Table S3. Selected bond lengths (Å) in compound **3**

|                      |            |                     |            |
|----------------------|------------|---------------------|------------|
| <b>Gd(1)-O(4)#1</b>  | 2.280(5)   | <b>Gd(1)-O(5)</b>   | 2.304(5)   |
| <b>Gd(1)-O(6)#2</b>  | 2.334(5)   | <b>Gd(1)-O(6)#2</b> | 2.334(5)   |
| <b>Gd(1)-O(1)</b>    | 2.488(5)   | <b>Gd(1)-O(2)</b>   | 2.496(5)   |
| <b>Gd(1)-O(7)</b>    | 2.497(6)   | <b>Gd(1)-O(8)</b>   | 2.518(6)   |
| <b>Cu(1)-N(3)#3</b>  | 2.024(6)   | <b>Cu(1)-Cu(3)</b>  | 2.5686(14) |
| <b>Cu(1)-I(1)</b>    | 2.6652(13) | <b>Cu(1)-I(3)</b>   | 2.6670(12) |
| <b>Cu(1)-I(2)</b>    | 2.6858(11) | <b>Cu(1)-Cu(2)</b>  | 2.7943(15) |
| <b>Cu(2)-N(1)</b>    | 2.029(6)   | <b>Cu(2)-I(1)</b>   | 2.6254(11) |
| <b>Cu(2)-I(1)#4</b>  | 2.6530(12) | <b>Cu(2)-I(2)</b>   | 2.7026(13) |
| <b>Cu(2)-Cu(2)#4</b> | 2.781(2)   | <b>Cu(3)-N(2)</b>   | 1.979(6)   |
| <b>Cu(3)-I(3)</b>    | 2.5220(11) | <b>Cu(3)-I(2)</b>   | 2.5652(12) |
| <b>I(1)-Cu(2)#4</b>  | 2.6531(12) |                     |            |

Symmetry codes: #1  $-x+1,-y+2,-z+1$  #2  $-x+1,-y+1,-z+1$  #3  $x-1/2,-y+1/2,z-1/2$   
#4  $-x+1/2,-y+1/2,-z+1$  #5  $x+1/2,-y+1/2,z+1/2$

Table S4. Selected bond lengths (Å) in compound 4

|                     |            |                      |            |
|---------------------|------------|----------------------|------------|
| <b>Gd(1)-O(2)#1</b> | 2.304(4)   | <b>Gd(1)-O(6)#2</b>  | 2.325(4)   |
| <b>Gd(1)-O(4)#1</b> | 2.350(4)   | <b>Gd(1)-O(5)</b>    | 2.357(3)   |
| <b>Gd(1)-O(3)</b>   | 2.371(4)   | <b>Gd(1)-O(1)</b>    | 2.382(3)   |
| <b>Gd(1)-O(8)</b>   | 2.471(5)   | <b>Gd(1)-O(7)</b>    | 2.663(6)   |
| <b>Cu(1)-N(1)</b>   | 2.008(5)   | <b>Cu(1)-I(3)</b>    | 2.6305(10) |
| <b>Cu(1)-Cu(4)</b>  | 2.6449(14) | <b>Cu(1)-Cu(3)</b>   | 2.6621(14) |
| <b>Cu(1)-I(2)</b>   | 2.7045(11) | <b>Cu(1)-Cu(2)</b>   | 2.7142(13) |
| <b>Cu(1)-I(1)</b>   | 2.7585(15) | <b>Cu(2)-I(4)#3</b>  | 2.6845(11) |
| <b>Cu(2)-I(1)</b>   | 2.6940(12) | <b>Cu(2)-I(4)</b>    | 2.6972(11) |
| <b>Cu(2)-I(2)</b>   | 2.7161(13) | <b>Cu(2)-Cu(3)</b>   | 2.7668(13) |
| <b>Cu(2)-Cu(4)</b>  | 2.8142(15) | <b>Cu(2)-Cu(2)#3</b> | 2.8709(18) |
| <b>Cu(3)-N(2)#4</b> | 2.011(5)   | <b>Cu(3)-I(1)</b>    | 2.5643(12) |
| <b>Cu(3)-I(3)</b>   | 2.6709(13) | <b>Cu(3)-Cu(4)</b>   | 2.7268(16) |
| <b>Cu(3)-I(4)</b>   | 2.8449(13) | <b>Cu(4)-N(3)#5</b>  | 2.030(5)   |
| <b>Cu(4)-I(2)</b>   | 2.6238(11) | <b>Cu(4)-I(3)</b>    | 2.7157(11) |
| <b>Cu(4)-I(4)</b>   | 2.7189(11) | <b>I(4)-Cu(2)#3</b>  | 2.6844(11) |

Symmetry codes: #1 -x+2,-y,-z+1 #2 -x+1,-y,-z+1 #3 -x+1,-y+1,-z #4 -x+1,-y+1,-z+1 #5 x-1,y,z-1 #6 x+1,y,z+1

Table S5. Elemental analyses of the four compounds and ground sample of compound 3

| Name                        | Calculated |       |       | Found |       |       |
|-----------------------------|------------|-------|-------|-------|-------|-------|
|                             | C (%)      | H (%) | N (%) | C (%) | H (%) | N (%) |
| Compound 1                  | 31.65      | 2.51  | 7.03  | 31.39 | 2.46  | 7.17  |
| Compound 2                  | 25.78      | 1.94  | 5.73  | 25.59 | 1.78  | 5.87  |
| Compound 3                  | 32.87      | 2.31  | 3.05  | 32.69 | 2.19  | 2.94  |
| Ground sample of Compound 3 | —          | —     | —     | 32.71 | 2.17  | 2.95  |
| Compound 4                  | 31.19      | 2.71  | 2.37  | 31.30 | 2.56  | 2.47  |

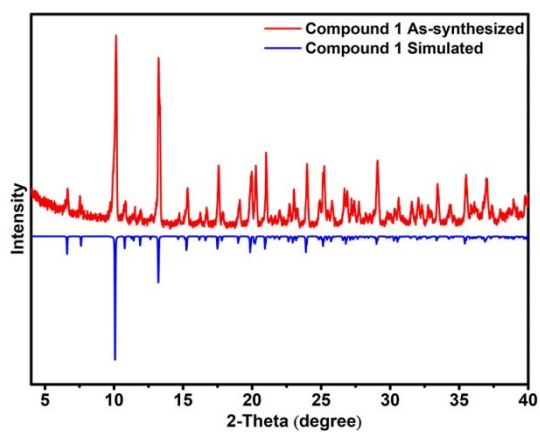

Figure S1. The XRD patterns of compound 1.

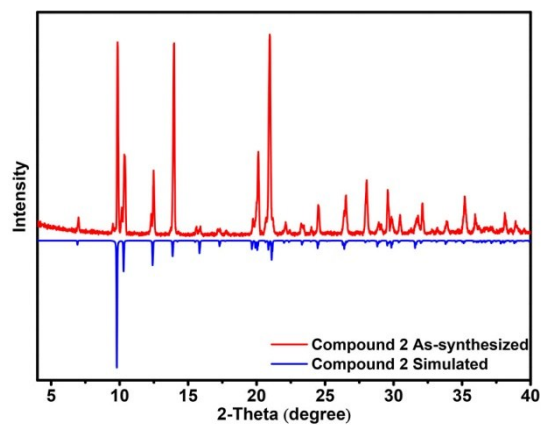

**Figure S2.** The XRD patterns of compound 2.

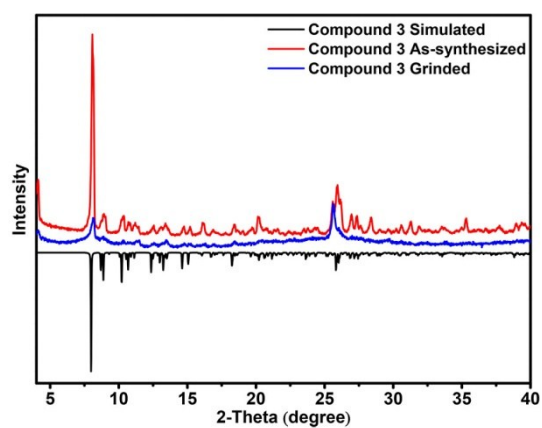

**Figure S3.** The XRD patterns of compound 3 ground sample of 3.

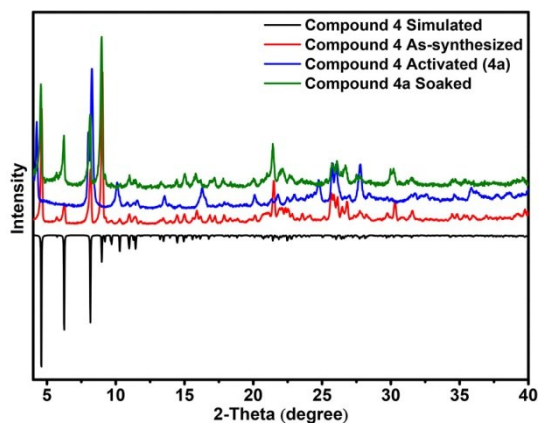

**Figure S4.** The XRD patterns of compound **4**, **4a** and the crystal powder of **4a** after soaking in 1,4-dioxane solvent.

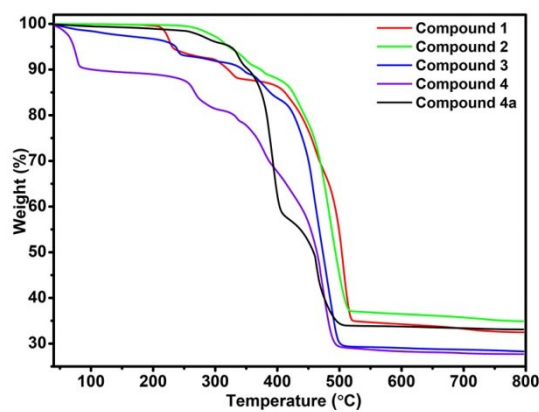

**Figure S5.** Thermogravimetric analysis curves of compound **1**, **2**, **3**, **4** and **4a**. The results suggest the guest solvents have been removed.



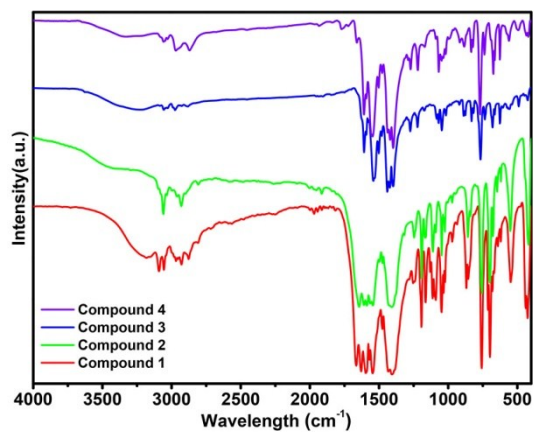

**Figure S6.** The IR spectra of compound 1, 2, 3 and 4.

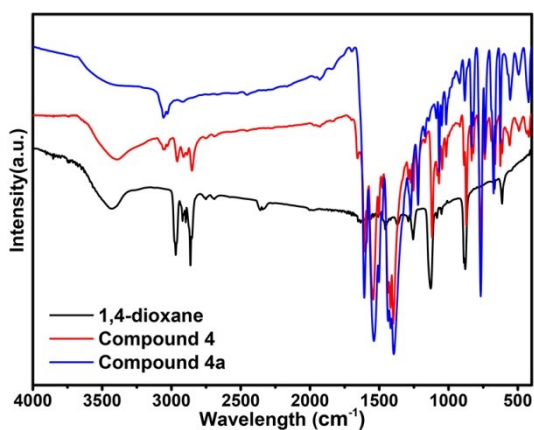

**Figure S7.** The IR spectra of 1, 4-dioxane, compound 4 and 4a. The characteristic IR absorption peaks of 1, 4-dioxane has disappeared in the IR spectra of 4a. These results are well consistent with the TG analysis curves.

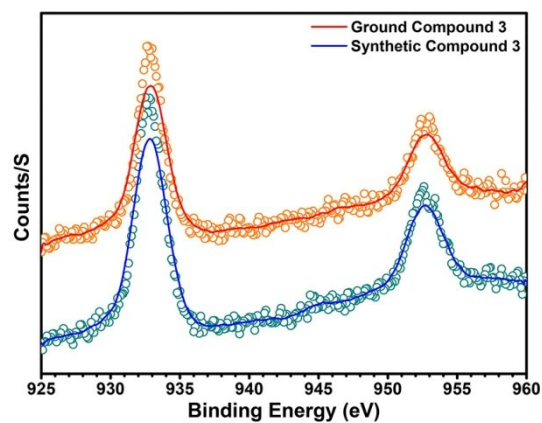

**Figure S8.** The Cu 2p XPS spectra of compound **3** and the ground sample of compound **3**.

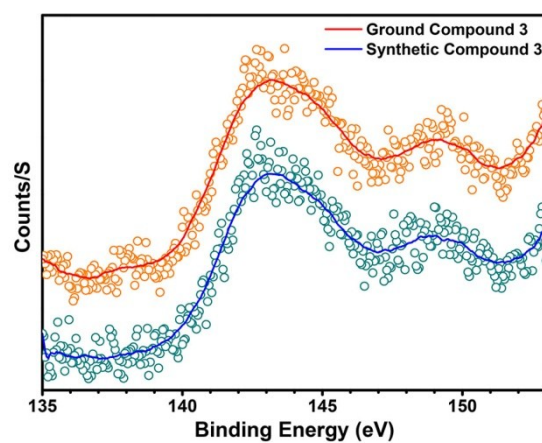

**Figure S9.** The Gd 4d XPS spectra of compound **3** and the ground sample of compound **3**.
